# Supplementary material for: Crystalline TiO 2 -passivated BiVO 4 ‖Ta 3 N 5 tandem photoanodes for efficient unassisted photoelectrochemical water splitting
Source: Royal Society of Chemistry journal article supplement (doi:10.1039/d5cc07054f), 2026-01-01
Supplement: d5cc07054f1.pdf [file d5cc07054f1.pdf]

## Supporting Information

*Kailun Deng<sup>a</sup>, Cui Jiwei<sup>a</sup>, Chenhe Wu<sup>a</sup>, Zhaohong Han<sup>a</sup>, Lequan Liu<sup>a\*</sup> and Jinhua Ye<sup>ab</sup>.*

*<sup>a</sup>Advanced Catalytic Materials Research Center, School of Materials Science and Engineering; State Key Laboratory of Precious Metal Functional Materials, Tianjin University, Tianjin, 300072, China.*

*<sup>b</sup>International Center for Materials Nanoarchitectonics (WPI-MANA), National Institute for Materials Science (NIMS), Tsukuba, 305-0044, Japan.*

*\*Corresponding Authors.*

*E-mail address: Lequan.Liu@tju.edu.cn*

**Preparation of BiVO<sub>4</sub> (BVO) photoanode.**

The first step was to prepare BiOI grown on the cleaned fluorine-doped tin oxide (FTO). 30 mM Bi(NO<sub>3</sub>)<sub>2</sub> (Aladdin, 99%) was dissolved in 400 mM KI (Aladdin, 99%) aqueous solution (50 mL). The pH was adjusted to 1.8 using dilute HNO<sub>3</sub> (Sinopharm, 99%) to form a clear red-orange solution (Solution A). Then, 100 mM p-benzoquinone (Sinopharm, 99%) was added to absolute ethanol (20 mL) to obtain solution B. Mix A and B with vigorous stirring for a few minutes for the dark black plating solution. The FTO substrate (2\*1 cm<sup>2</sup>) was used as the working electrode (WE), the platinum foil was used as the counter electrode (CE), and the Ag/AgCl electrode in a saturated KCl solution was used as a reference electrode (RE) to form a 3-electrode system. Prior to electrodeposition, the FTO was blown dried with Ar. Given a constant voltage of -0.15 V vs. Ag/AgCl ( $V_{\text{Ag/AgCl}}$ ) for 7 mins at room temperature, the deposition area was 1 cm<sup>2</sup>, then the obtained BiOI electrode was rinsed with deionized water and blown dry with Ar. The second step was to convert BiOI to BiVO<sub>4</sub>. A 200 mM solution of vanadium acetylacetonate (Aladdin, 99%) in dimethyl sulfoxide (Rionlon, 99%) was prepared, and 0.2 mL of the solution was drop-cast onto the BiOI electrode. The coated substrate was annealed at 723 K for 2 h with a ramping rate of 2 K min<sup>-1</sup> in air. The resulting film was then immersed in a 1 M NaOH solution and gently stirred for 30 min, followed by rinsing with deionized water to obtain a bright yellow BiVO<sub>4</sub>.

**Preparation of BiVO<sub>4</sub>/an-TiO<sub>2</sub> (BVO/an-TiO<sub>2</sub>) photoanode.**

A total of 20 mL of deionized water was placed in a beaker and cooled to 273 K using an ice-water bath. Then, 200  $\mu$ L of TiCl<sub>3</sub> solution (Aladdin, 20%) was added dropwise

under stirring until a homogeneous dispersion was obtained. Upon removal, the  $\text{BiVO}_4$  photoanode initially appeared black; it was left to stand for 10 min until the surface returned to yellow, followed by rinsing with deionized water and drying under an Ar flow. Finally, the photoanode was annealed at 200 °C for 30 min to yield the  $\text{BiVO}_4/\text{TiO}_2$  sample.

#### **Preparation of $\text{BiVO}_4/\text{am-TiO}_2$ (BVO/am- $\text{TiO}_2$ ) photoanode.**

The synthesis of  $\text{BiVO}_4/\text{am-TiO}_2$  photoanode is similar to that of  $\text{BiVO}_4/\text{an-TiO}_2$ , and no further calcination or thermal treatment is required after washing and drying.

#### **Preparation of $\text{BiVO}_4/\text{FeOOH}/\text{NiOOH}$ (BVO/ $\text{FeOOH}/\text{NiOOH}$ ) photoanode.**

To load the  $\text{FeOOH}/\text{NiOOH}$  OECs, a  $\text{FeOOH}$  layer was first photodeposited on  $\text{BiVO}_4$  followed by the photodeposition of  $\text{NiOOH}$ . Photodeposition of  $\text{FeOOH}$  on the  $\text{BiVO}_4$  electrode was carried out in a 0.1 M  $\text{FeSO}_4$  (Aladdin, 99%) solution while gently stirring. Prior to the photodeposition of  $\text{FeOOH}$ , the solution was purged with Ar for 30 min. An undivided three-electrode cell was used, which was composed of a  $\text{BiVO}_4$  WE, a Pt CE, and a  $\text{Ag}/\text{AgCl}$  (3.5 M KCl) RE. AM 1.5 G was used as the light source. To facilitate photodeposition, an external bias of ca. 0.25  $V_{\text{Ag}/\text{AgCl}}$  (3.5 M KCl) was applied for 90 s. After photodeposition, an electrodeposition of  $\text{FeOOH}$  was carried out in the same solution by applying +1.2  $V_{\text{Ag}/\text{AgCl}}$  (3.5 M KCl) for 1 min. This was to deposit  $\text{FeOOH}$  on any bare  $\text{BiVO}_4$  or FTO surfaces exposed to the electrolyte. The same procedure used for the photodeposition of  $\text{NiOOH}$  was used except for the plating solution, which was a 0.1 M  $\text{NiSO}_4$  (Aladdin, 99%) solution with pH adjusted to 6.5-7.2 by carefully adding NaOH. To facilitate photodeposition, an external bias of ca.

0.11  $V_{\text{Ag/AgCl}}$  (3.5 M KCl) was applied for 30s. After the photodeposition, electrodeposition of NiOOH was carried out by applying +1.2  $V_{\text{Ag/AgCl}}$  (3.5 M KCl) for 1 min in the same solution.

**Preparation of  $\text{BiVO}_4/\text{an-TiO}_2/\text{FeOOH}/\text{NiOOH}$  (BVO/an- $\text{TiO}_2/\text{FeOOH}/\text{NiOOH}$ ) and  $\text{BiVO}_4/\text{am-TiO}_2/\text{FeOOH}/\text{NiOOH}$  (BVO/am- $\text{TiO}_2/\text{FeOOH}/\text{NiOOH}$ ) photoanodes.**

The cocatalysts were loaded onto BVO/an- $\text{TiO}_2$  and BVO/am- $\text{TiO}_2$  using the same method via photoelectrochemical deposition, with charge amounts of 45  $\text{mC}/\text{cm}^2$  for FeOOH and 22  $\text{mC}/\text{cm}^2$  for NiOOH, respectively.

#### **Preparation of $\text{Ta}_2\text{O}_5 \cdot n\text{H}_2\text{O}$ .**

Amorphous  $\text{Ta}_2\text{O}_5 \cdot n\text{H}_2\text{O}$  were fabricated based on the synthesis of  $\text{Na}_3\text{TaO}_4$  and  $\text{Na}_8[\text{Ta}_6\text{O}_{19}]$ . Briefly, 1.10 g of  $\text{Ta}_2\text{O}_5$  and 1 g of NaOH were thoroughly mixed and then transferred into an alumina crucible and calcined at 723 K for 15 h in air. The resulting solid was subsequently dissolved in 125 mL  $\text{H}_2\text{O}$  by sonication and vigorous magnetic stirring, giving an aqueous solution of  $\text{Na}_8[\text{Ta}_6\text{O}_{19}]$  and NaOH with a pH of approximately 12. The pH of this solution was then adjusted to 6 by adding a 0.5 M aqueous  $\text{H}_2\text{SO}_4$  solution. In this process, the  $[\text{Ta}_6\text{O}_{19}]^{8-}$  anions were protonated, underwent polymerization, and then were decomposed into  $\text{Ta}_2\text{O}_5 \cdot n\text{H}_2\text{O}$ . The white precipitate obtained from this process was washed with pure water to remove residual  $\text{Na}_2\text{SO}_4$ , and then dried overnight at 333 K under vacuum.

#### **Preparation of $\text{Ta}_3\text{N}_5$ .**

$\text{Ta}_2\text{O}_5 \cdot n\text{H}_2\text{O}$  was loaded into a quadrate alumina crucible and heated at 1173 K for 6 h

under a 100 mL min<sup>-1</sup> flow of NH<sub>3</sub>. The aimed photocatalysts were obtained after rinsing and overnight drying of the resulting solids at 333 K under vacuum.

#### **Preparation of Ta<sub>3</sub>N<sub>5</sub> photoanode.**

Typically, 3 mg of Ta<sub>3</sub>N<sub>5</sub> was dispersed in 1 mL ethanol and 40 μL Nafion solution to form a suspension, which was sprayed onto F-doped tin oxide (FTO) glass using an airbrush on a hot plate maintained at 353 K. For each electrode, a total spraying volume of 400 μL was applied to a defined 1 × 1 cm<sup>2</sup> area on the FTO substrate, which served as the working electrode.

#### **Electrodeposition of CoOOH cocatalyst.**

A Co-containing catalyst was electrodeposited from a solution of 0.01 M cobalt(II) nitrate hexahydrate (Aladdin, 99%) in a three-electrode electrochemical cell, while a Ag/AgCl reference electrode and a Pt counter electrode were used as the reference and counter electrodes, respectively. The deposition was performed by a multi-step potentiostatic method. On the basis of linear sweep voltammetric data, a nucleation step was conducted by applying -1.05 V<sub>Ag/AgCl</sub> for 5 s to initialize the formation of small seed particles, followed by a slower crystal growth step during the 10 s at a less negative potential of -0.85 V<sub>Ag/AgCl</sub>. After electrodeposition, the electrodes were rinsed with deionized water and dried in a N<sub>2</sub> atmosphere.

#### **Photoelectrochemical measurements.**

The photoelectrochemical (PEC) properties of the samples were tested in a three-electrode system under AM 1.5 G simulated sunlight (100 mW cm<sup>-2</sup>) on working station CHI 760E. The sample grown on the FTO substrate was used as the working electrode

(WE), the platinum sheet was used as the counter electrode (CE), and the Ag/AgCl (saturated KCl) electrode as reference electrode. The buffer was 1 M potassium borate solution (pH = 9.5). Linear scanning voltammetry tests were performed at 0-1.23 V vs reversible hydrogen electrode ( $E_{RHE}$ ) at a rate of 20 mV/s. All potentials here were converted with the formula:

$$E_{RHE} = E_{Ag/AgCl} + 0.197 + 0.0591 \cdot pH$$

where  $E_{Ag/AgCl}$  was the potential obtained by Ag/AgCl reference electrode. In the presence or absence of 0.2 M  $Na_2SO_3$ ,  $Na_2SO_3$  oxidation and water oxidation are performed. Electrochemical impedance spectroscopy (EIS) was tested under lighting conditions at 0.7 V<sub>RHE</sub>.

### Theory of PEC photoelectrodes.

According to previous theories, the water oxidation current density  $J_{H_2O}$  is determined by the product of  $J_{abs}$ ,  $\eta_{sep}$  and  $\eta_{trans}$ . When the electrolyte is changed to 1M K-B<sub>i</sub> buffer containing 0.2 M  $Na_2SO_3$ ,  $\eta_{trans}$  at this time theoretically becomes 100%, thus the charge-transfer efficiency ( $\eta_{trans}$ ) is obtained by dividing the photocurrent for water oxidation ( $J_{H_2O}$ ) by that for sulfite oxidation ( $J_{Na_2SO_3}$ )

$$\eta_{trans} = \frac{J_{H_2O}}{J_{Na_2SO_3}} \quad (S1)$$

The applied bias photon-to-current efficiency (ABPE) for water splitting was calculated from the following equation:

$$ABPE(\%) = \left[ \frac{J(mA/cm^2) \times (1.23 - V_{bias})(V)}{P_{in}(mW/cm^2)} \right] AM 1.5G \times 100\% \quad (S2)$$

Where  $J$  represents the photocurrent density given by the workstation,  $V_{bias}$  represents

given voltage,  $P_{in}$  represents the power of the solar simulator, which is  $100 \text{ mW cm}^{-2}$ .

The incident photon-to-electron conversion efficiency (IPCE) was measured using a monochromator connected to a three-electrode system. The IPCE spectra were recorded in the wavelength range of 350-600 nm with a wavelength step of 10 nm under monochromatic illumination. The photocurrent density was collected at 1.23 VRHE after reaching a steady state at each wavelength. The IPCE values were calculated according to the following equation:

$$IPCE(\%) = \frac{J \times 1240}{\lambda \times P_{in}} \times 100\% \quad (S3)$$

where  $J$  represents the steady-state photocurrent density under monochromatic light at 1.23 V<sub>RHE</sub>,  $\lambda$  represents the wavelength of monochromatic light, and  $P_{in}$  represents the incident light power density measured at the electrode surface.

#### **Fabrication of Integrated (BiVO<sub>4</sub>||Ta<sub>3</sub>N<sub>5</sub>)-Si tandem cell.**

BiVO<sub>4</sub> and Ta<sub>3</sub>N<sub>5</sub> photoanodes were bonded using conductive silver paste, with the spacing between the two electrodes controlled at approximately 1 mm to form the BiVO<sub>4</sub>||Ta<sub>3</sub>N<sub>5</sub> composite photoanode. The composite photoanode was electrically connected to the positive terminal of the Si solar cell using a copper wire and conductive silver paste, while a Pt foil cathode was connected to the negative terminal of the Si solar cell in the same manner. The Si solar cell was fixed to the backside of the BiVO<sub>4</sub>||Ta<sub>3</sub>N<sub>5</sub> composite photoanode with epoxy resin, which was also applied to encapsulate and insulate all electrical connections from the electrolyte. The geometric active area of the integrated tandem device was  $15 \text{ cm}^2$ .

#### **PEC H<sub>2</sub> and O<sub>2</sub> evolution measurements.**

Using Ar as a carrier gas, the amounts of H<sub>2</sub> and O<sub>2</sub> gases evolved from the PEC cell were analyzed using a gas chromatograph (GC-8A with TCD, Shimadzu). Light source and electrolyte were the same as those used for above PEC measurements, and the gas products were sampled every 1 hour.

### **Characterizations.**

The crystal structure of the catalyst was characterized by X-ray diffraction (XRD; MiniFlex600) equipped with Cu K $\alpha$  radiation at 40 kV and 200 mA at a scanning rate of 10 °/min. The morphology of the catalyst was observed by scanning electron microscope (SEM; S-4800, Hitachi, Japan). Transmission electron microscope (TEM; Tecnai G2 F20 FEI, U.S.A.) was used for the lattice analysis. The atomic scale lattice space was measured through Aberration-corrected scanning transmission electron microscopy (JEM-ARM200F, JEOL, Japan). The Raman spectra were recorded on Raman spectrometer (XploRa, HORIBA Scientific, USA) equipped with a green laser of 532 nm. X-ray photoelectron spectrum (XPS; ESCALAB-250Xi) is used to measure the chemical state of the catalyst surface elements, and the binding energy was referenced to C 1s peaks (284.8 eV) of contaminated carbon. Photoluminance spectra (PL; Horiba Jobin Yvon Fluorolog) was used for electron lifetime with the excitation light at 420 nm. The ultraviolet–visible diffuse reflectance spectra (UV–vis DRS; Shimadzu UV-2700) was used to study the optical performance. Fourier transform infrared (FTIR) spectroscopy was performed using Nicolet 6700 (Thermo SCIENTIFIC, USA). X-ray photoelectron spectroscopy (XPS) measurement was performed on Escalab 250 (Thermo Scientific, USA), using monochromatic Al K $\alpha$



radiation and C 1s peak (284.8 eV) as a reference. Steady-state fluorescence measurements and transient fluorescence were carried out on a fluorescence spectrophotometer (Fluorolog-3, HORIBA Scientific, USA) with an excitation wavelength of 360 nm and 390 nm, respectively.

### **Estimation of Film Thickness from XPS Measurements**

The film thickness ( $d$ ) was estimated based on the attenuation of the substrate signal intensity according to the following equation:

$$d = \lambda \cos \theta \ln \left( \frac{I_0}{I} \right) \quad (\text{S4})$$

where  $\lambda$  is the effective attenuation length (EAL) of the substrate photoelectrons in the overlayer,  $\theta$  is the photoelectron take-off angle with respect to the sample surface normal (typically  $90^\circ$  for normal emission),  $I_0$  is the XPS peak intensity of the substrate without an overlayer, and  $I$  is the measured substrate intensity after overlayer deposition.

In cases where film density differs from the tabulated IMFP reference material, a correction was applied using the ratio of material densities to ensure accurate thickness estimation:

$$d_{corrected} = d \times \frac{\rho_{reference}}{\rho_{film}} \quad (\text{S5})$$

In which  $\rho_{reference}$  is the reference density associated with the IMFP source and  $\rho_{film}$  is the actual film density. In this work, the effective attenuation length  $\lambda$  was estimated using the TPP-2M formula. The calculated thickness provides an approximate value of the overlayer film, assuming a uniform and continuous coverage.

## Calculation of Theoretical Solar-to-hydrogen Efficiency of BiVO<sub>4</sub>||Ta<sub>3</sub>N<sub>5</sub> photoanode

The theoretical STH efficiency of the BiVO<sub>4</sub>||Ta<sub>3</sub>N<sub>5</sub> tandem photoanode under AM 1.5G illumination was calculated based on the maximum attainable photocurrent density, following established detailed-balance and tandem-absorber optical models.<sup>1-3</sup> The UV–vis absorption spectra of BiVO<sub>4</sub> and Ta<sub>3</sub>N<sub>5</sub> were first converted to absorptance using

$$\alpha(\lambda) = 1 - 10^{-A(\lambda)} \quad (\text{S6})$$

where  $A(\lambda)$  is the measured absorbance. For the tandem configuration, the total absorptance was determined by

$$\alpha_{tandem}(\lambda) = 1 - (1 - \alpha_{BVO}(\lambda))(1 - \alpha_{Ta_3N_5}(\lambda)) \quad (\text{S7})$$

which represents the probability that a photon is absorbed by at least one of the two photoanodes.

The AM 1.5G spectral irradiance was converted into the corresponding photon flux using

$$\Phi(\lambda) = \frac{I_{AM\ 1.5G}(\lambda)\lambda}{hc} \quad (\text{S8})$$

Assuming that each absorbed photon generates one electron, the theoretical photocurrent density was obtained by integrating the absorbed photon flux over the usable spectral range:

$$= q \int_{\lambda_{min}}^{\lambda_{max}} \Phi(\lambda) \alpha_{tandem}(\lambda) d\lambda \quad (\text{S9})$$

where  $q$  is the elementary charge.

The theoretical STH efficiency was then calculated according to

$$\eta_{STH,th} = \frac{J_{ph,th} \times 1.23 \text{ V}}{P_{in}} \quad (S10)$$

with  $P_{in} = 100 \text{ mW cm}^{-2}$  for AM 1.5G illumination.

### Hall effect measurement details Hall effect measurements

Hall effect measurements were performed using a van der Pauw configuration at room temperature ( $\approx 300 \text{ K}$ ). For accurate determination of the intrinsic transport properties,  $\text{BiVO}_4$ ,  $\text{BiVO}_4/\text{am-TiO}_2$ , and  $\text{BiVO}_4/\text{an-TiO}_2$  films were deposited onto insulating glass substrates under the same electrodeposition and annealing conditions used for the photoanodes. Four ohmic contacts were made at the sample corners using silver paste, and a perpendicular magnetic field of  $0.5 \text{ T}$  was applied during the measurements.

The Hall voltage was recorded under a constant applied current, and the Hall coefficient, carrier concentration, and carrier mobility were calculated following standard van der Pauw procedures. All samples exhibited n-type behaviour, in agreement with previous studies on  $\text{BiVO}_4$ -based semiconductors. The mobility values presented in Fig. 3d were obtained directly from these measurements and reflect the intrinsic transport properties of the respective films.

**Table S1 Hall effect results for the BVO-based films at 300 K.**

| Sample                  | Temperatur<br>e<br>(K) | Resistivity<br>( $\Omega \cdot \text{cm}$ ) | Mobility<br>( $\text{cm}^2 \text{V}^{-1} \text{s}^{-1}$ ) | Carrier<br>concentration ( $\text{cm}^{-3}$ ) | Hall coefficient<br>( $\text{cm}^3 \text{C}^{-1}$ ) | f-factor |
|-------------------------|------------------------|---------------------------------------------|-----------------------------------------------------------|-----------------------------------------------|-----------------------------------------------------|----------|
| BVO                     | 300                    | 3.86E+04                                    | 1.42E+00                                                  | 1.14E+14                                      | -5.49E+04                                           | 9.02E-01 |
| BVO/am-TiO <sub>2</sub> | 300                    | 2.17E+04                                    | 1.53E+00                                                  | 1.88E+14                                      | -3.32E+04                                           | 9.16E-01 |
| BVO/an-TiO <sub>2</sub> | 300                    | 2.33E+03                                    | 4.78E+00                                                  | 5.61E+14                                      | -1.11E+04                                           | 9.97E-01 |

### Time-resolved photoluminescence (TRPL) analysis

Time-resolved photoluminescence (TRPL) decay curves were collected for BVO, BVO/am-TiO<sub>2</sub>, and BVO/an-TiO<sub>2</sub> under pulsed excitation at the emission maximum of BiVO<sub>4</sub>. The decay profiles were fitted using a standard biexponential function:

$$I(t) = A_1 \exp\left(-\frac{t}{\tau_1}\right) + A_2 \exp\left(-\frac{t}{\tau_2}\right) \quad (\text{S11})$$

where  $A_1$  and  $A_2$  are the pre-exponential factors, and  $\tau_1$  and  $\tau_2$  correspond to the fast and slow decay components, respectively. The fast component ( $\tau_1$ ) is associated with interfacial recombination processes that are strongly influenced by surface defect density and interfacial hole extraction efficiency, whereas the slow component ( $\tau_2$ ) represents bulk electron-hole recombination within BiVO<sub>4</sub>.

The amplitude-weighted average lifetime  $\tau_{\text{average}}$  was calculated according to:

$$\tau_{\text{average}} = \frac{A_1 \tau_1^2 + A_2 \tau_2^2}{A_1 \tau_1 + A_2 \tau_2} \quad (\text{S12})$$

This definition captures the overall recombination dynamics and provides a reliable comparison among samples with distinct interfacial properties.

### **Comparison with BiVO<sub>4</sub> Photoanodes Prepared by Alternative Methods**

According to previous reports, BiVO<sub>4</sub> photoanodes have been fabricated using various deposition techniques, including spray pyrolysis, sol-gel processing, and physical vapor deposition methods such as sputtering. Spray-pyrolyzed BiVO<sub>4</sub> films can exhibit good crystallinity after high-temperature annealing; however, their photoelectrochemical performance is often limited by the short carrier diffusion length of BiVO<sub>4</sub>, which requires the use of relatively thin films or structural design strategies to alleviate bulk recombination losses<sup>4</sup>. In contrast, sol-gel derived films may suffer from increased

structural disorder and defect density due to solution-derived porosity, leading to enhanced charge recombination. Sputtering can produce dense and uniform BiVO<sub>4</sub> films with improved crystallinity, but the resulting photoanodes commonly remain constrained by low carrier mobility, while the method itself involves higher cost and limited scalability. Despite these differences in fabrication routes and film characteristics, BiVO<sub>4</sub> photoanodes prepared by different methods generally exhibit limited carrier mobility and short carrier diffusion lengths, indicating that photoelectrochemical performance is primarily constrained by the intrinsic electronic properties of BiVO<sub>4</sub> rather than the specific deposition technique. In this context, electrodeposition offers a practical balance between material quality, scalability, and compatibility with subsequent surface and interface engineering.

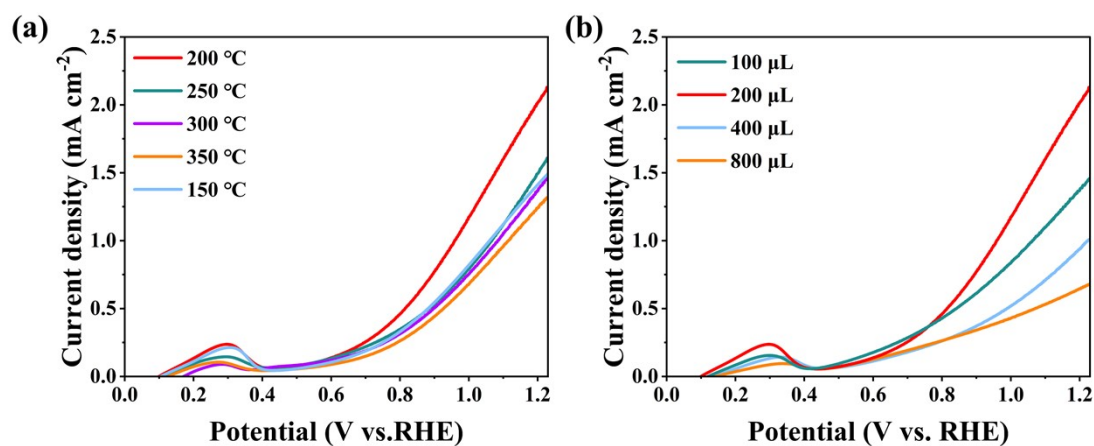

**Figure S1** The synthesis parameters of the anatase  $\text{TiO}_2$  layer. (a) Different annealing temperature (150, 200, 250, 300, and 350 °C). (b) Different amounts of  $\text{TiCl}_3$  solution (100, 200, 400, and 800  $\mu\text{L}$ ).

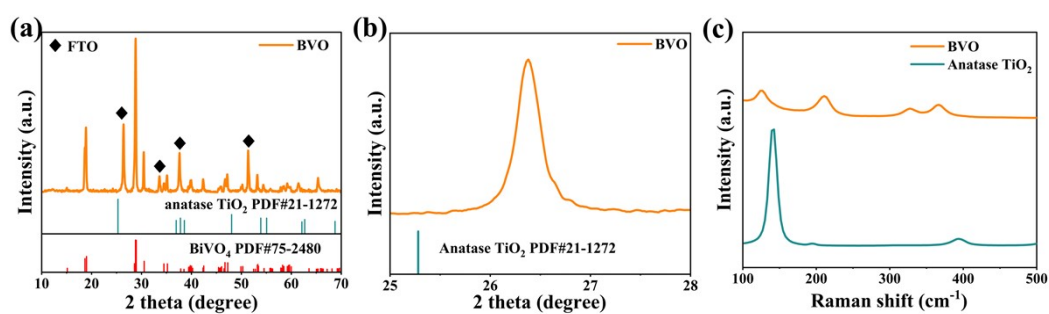

**Figure S2** (a) XRD patterns, and (b) slow-scan XRD patterns of BVO (c) Raman spectra of BVO and anatase  $\text{TiO}_2$ .

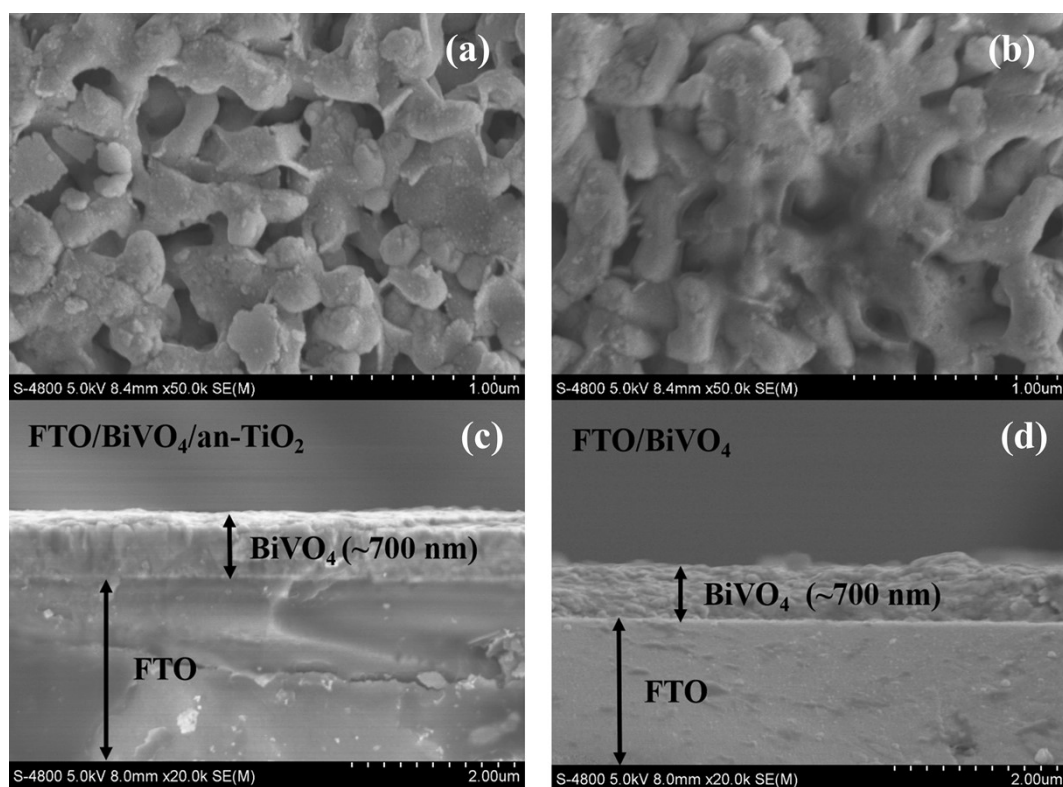

**Figure S3** Top-view SEM images of (a) BVO/an-TiO<sub>2</sub> and (b) BVO/am-TiO<sub>2</sub>.

Side lateral view SEM images of (c) BVO/an-TiO<sub>2</sub> and (d) BVO/am-TiO<sub>2</sub>.

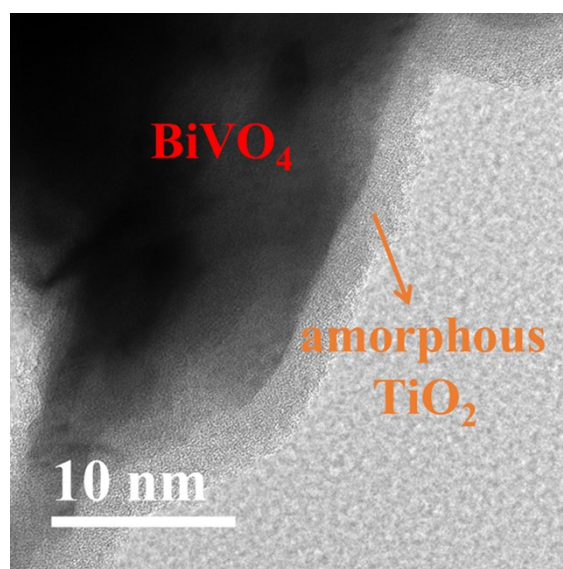

**Figure S4** TEM image of the BVO/am-TiO<sub>2</sub> photoanode.

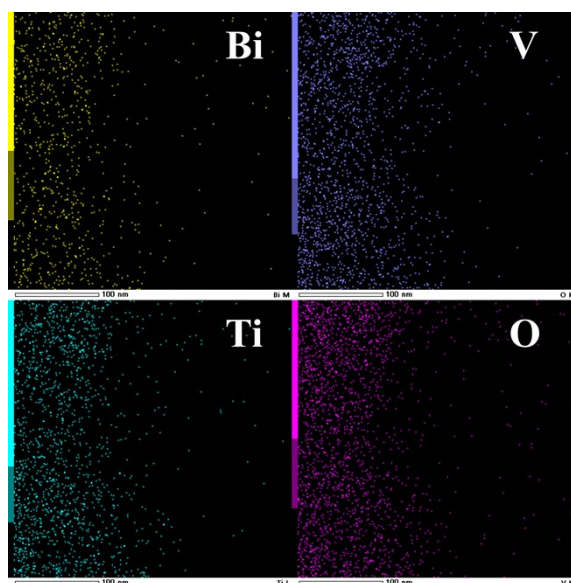

**Figure S5** Elemental mapping images of BVO/an-TiO<sub>2</sub>/FeOOH/NiOOH, showing the distributions of Bi, O, V, and Ti elements.

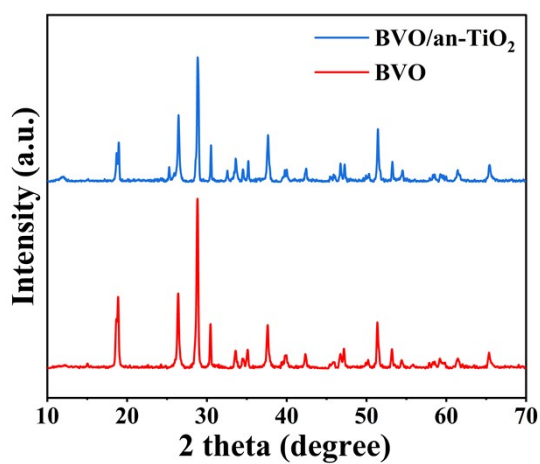

**Figure S6** XRD results of BVO and BVO/an-TiO<sub>2</sub>.



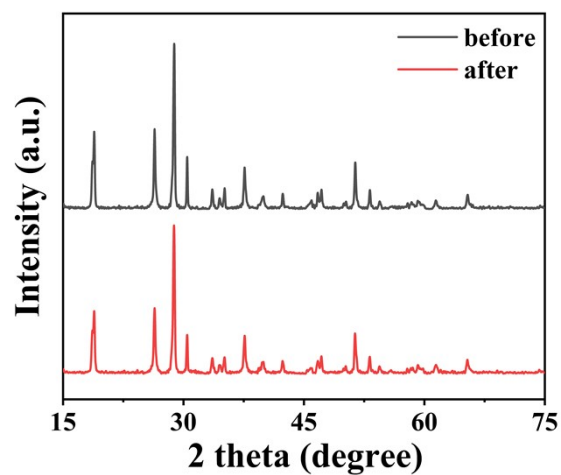

**Figure S7** XRD patterns of BVO/an-TiO<sub>2</sub>/FeOOH/NiOOH before and after the stability test.

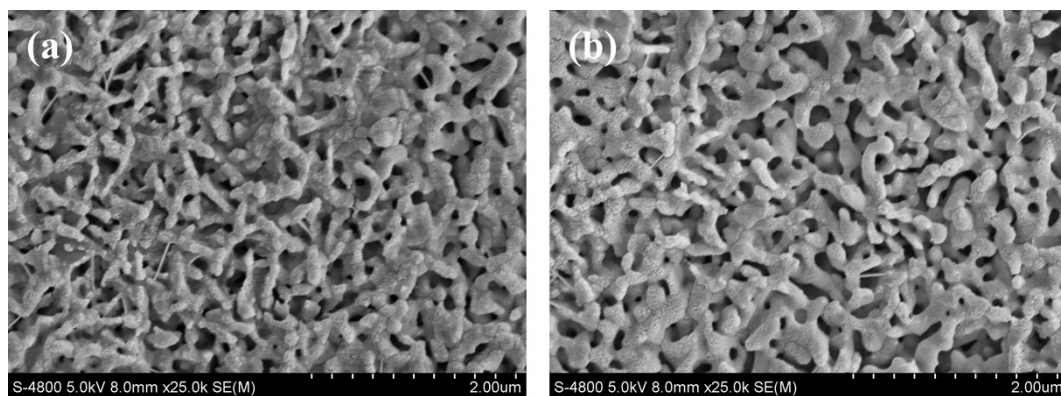

**Figure S8** SEM of BVO/TiO<sub>2</sub>/FeOOH/NiOOH (a) before and (b) after stability test.

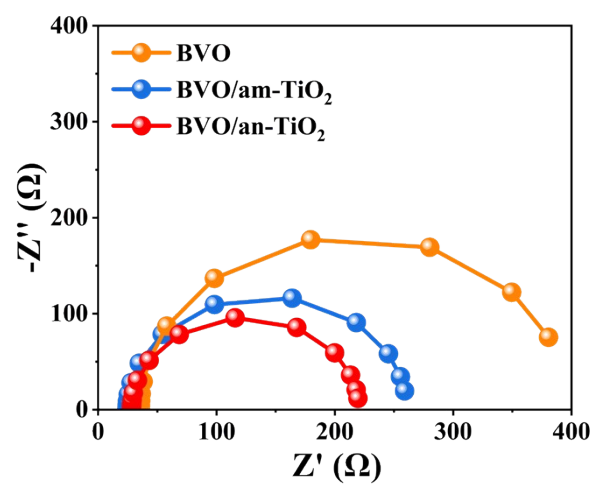

**Figure S9** Electrochemical impedance spectra (EIS) measured at 0.7 V<sub>RHE</sub>.

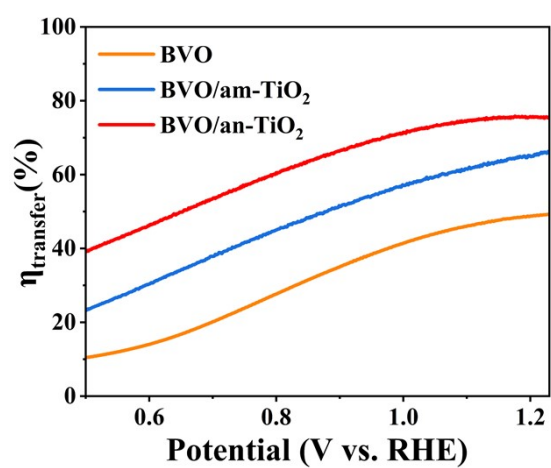

**Figure S10** Charge transfer efficiency of BVO, BVO/am-TiO<sub>2</sub>, and BVO/an-TiO<sub>2</sub>.

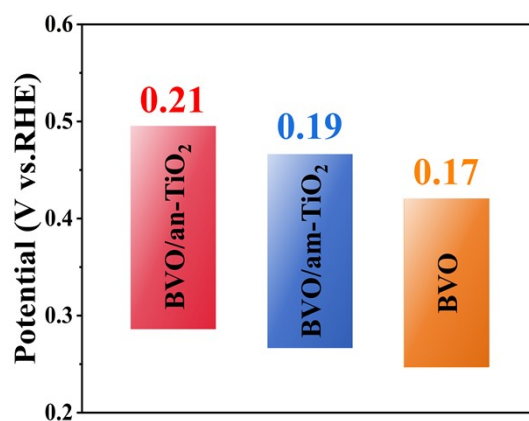

**Figure S11** Open-circuit potentials ( $U_{OC}$ ) measured in the dark and under AM 1.5G illumination.

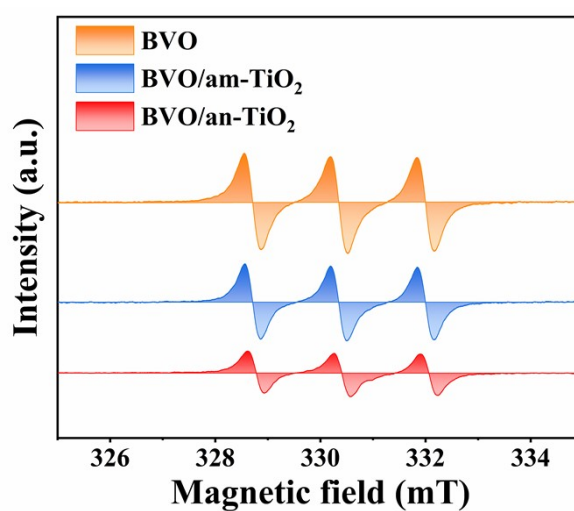

**Figure S12** EPR spectra of BVO, BVO/am-TiO<sub>2</sub>, and BVO/an-TiO<sub>2</sub> (using TEMPO as probe).

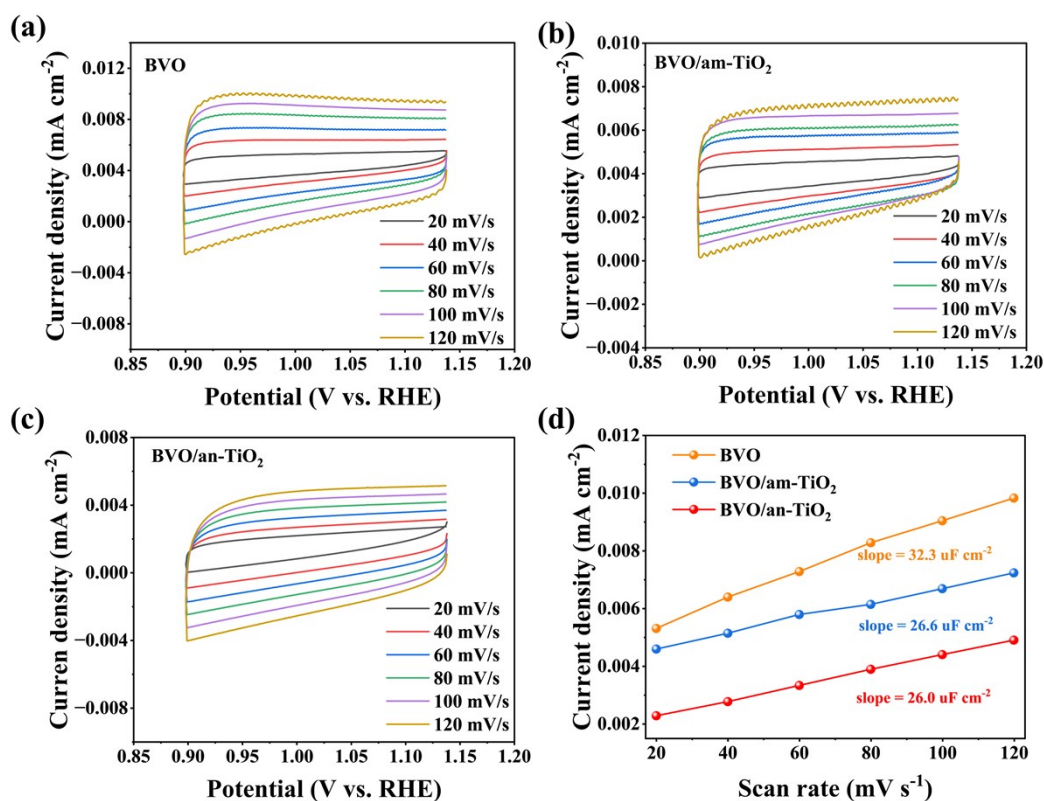

**Figure S13** (a)-(c) Cyclic voltammetry tested in the dark for BVO, BVO/am-TiO<sub>2</sub> and BVO/an-TiO<sub>2</sub>. (d) Charging current densities recorded at 1.138 V<sub>RHE</sub> at different scan rates (20, 40, 60, 80, 100, 120 mV/s).

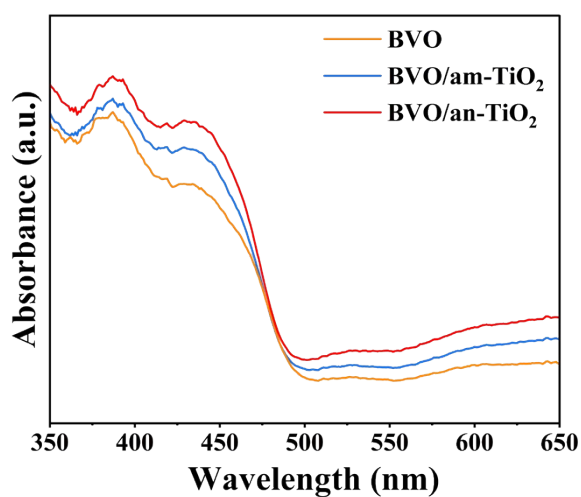

**Figure S14** UV-vis spectra of BVO, BVO/am-TiO<sub>2</sub> and BVO/an-TiO<sub>2</sub>.

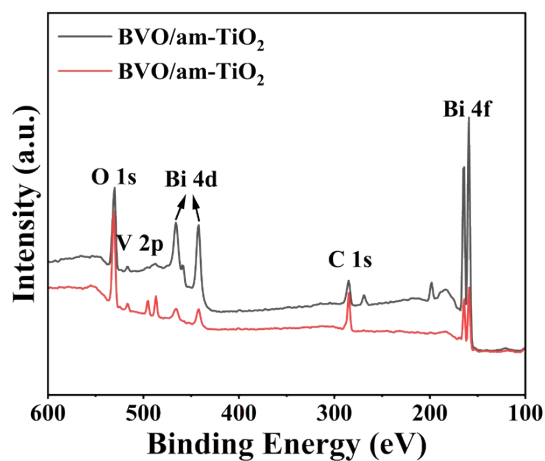

**Figure S15** XPS spectra of BVO/am-TiO<sub>2</sub> and BVO/an-TiO<sub>2</sub> photoanodes.

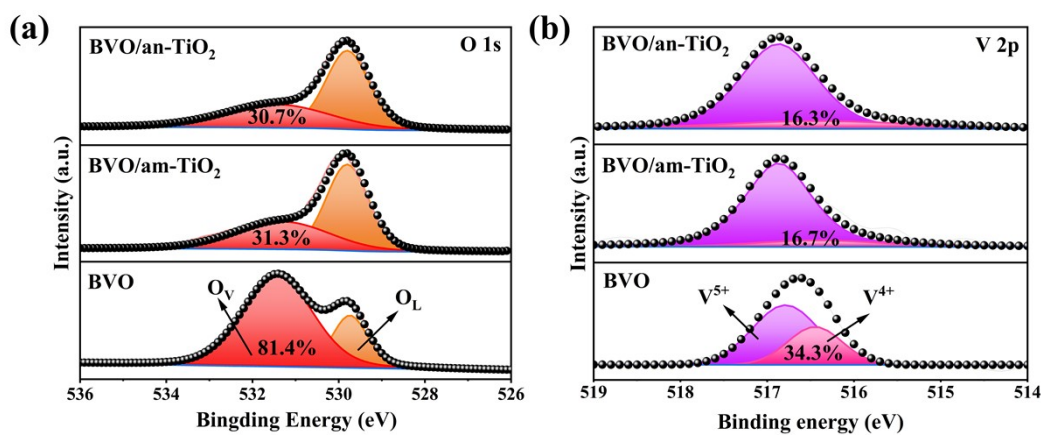

**Figure S16** (a) O 1s and (b) V 2p XPS spectra of BVO, BVO/am-TiO<sub>2</sub>, and BVO/an-TiO<sub>2</sub>.

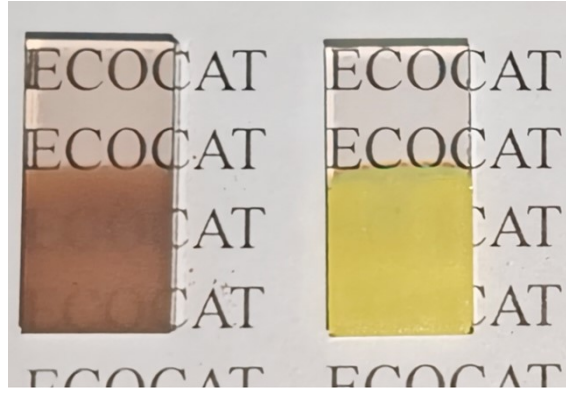

**Figure S17** (a)  $\text{Ta}_3\text{N}_5/\text{CoOOH}$  photoanode. (b)  $\text{BVO}/\text{an-TiO}_2/\text{FeOOH}/\text{NiOOH}$  photoanode. Although the  $\text{BiVO}_4$  film appears non-transparent, it exhibits wavelength-dependent absorption and partial light transmission in the visible region relevant for tandem operation.

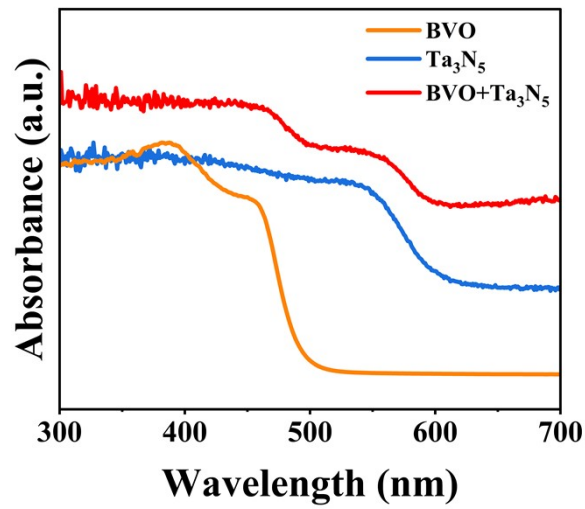

**Figure S18** UV-vis spectra of BVO,  $\text{Ta}_3\text{N}_5$ , and  $\text{BVO}||\text{Ta}_3\text{N}_5$  photoanodes.

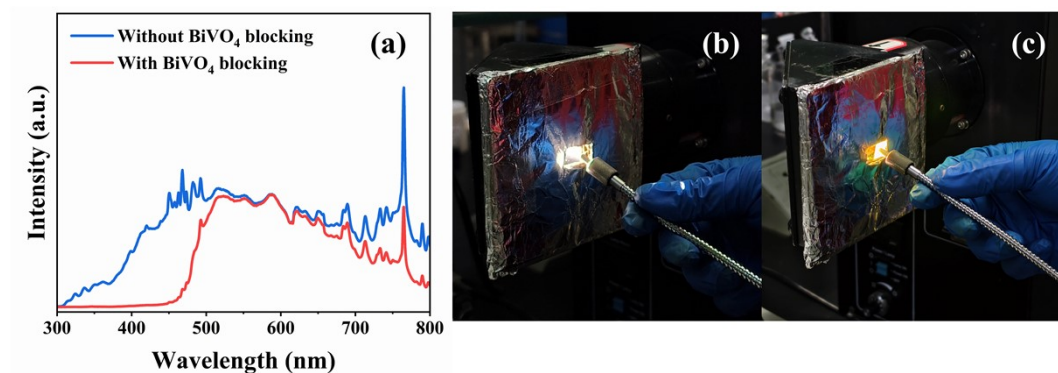

**Figure S19** (a) AM 1.5G spectral distribution measured under conditions with and without blocking by the BiVO<sub>4</sub> photoanode. (b) Photograph of the AM 1.5G spectral measurement setup without BiVO<sub>4</sub> photoanode blocking. (c) Photograph of the AM 1.5G spectral measurement setup with BiVO<sub>4</sub> photoanode blocking.

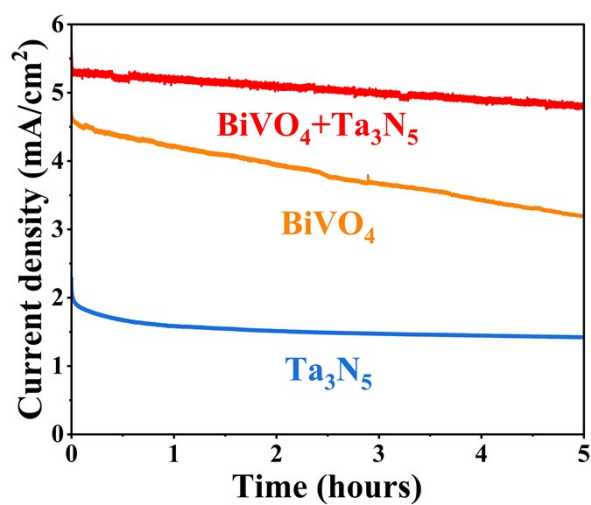

**Figure S20** Stability tests of BVO/an-TiO<sub>2</sub>/FeOOH/NiOOH, Ta<sub>3</sub>N<sub>5</sub>/CoOOH, and BVO/an-TiO<sub>2</sub>/FeOOH/NiOOH||Ta<sub>3</sub>N<sub>5</sub>/CoOOH photoanodes. The BiVO<sub>4</sub>+Ta<sub>3</sub>N<sub>5</sub> dual photoanode maintains a higher steady-state photocurrent than BiVO<sub>4</sub> and Ta<sub>3</sub>N<sub>5</sub> under continuous illumination, consistent with effective tandem operation.

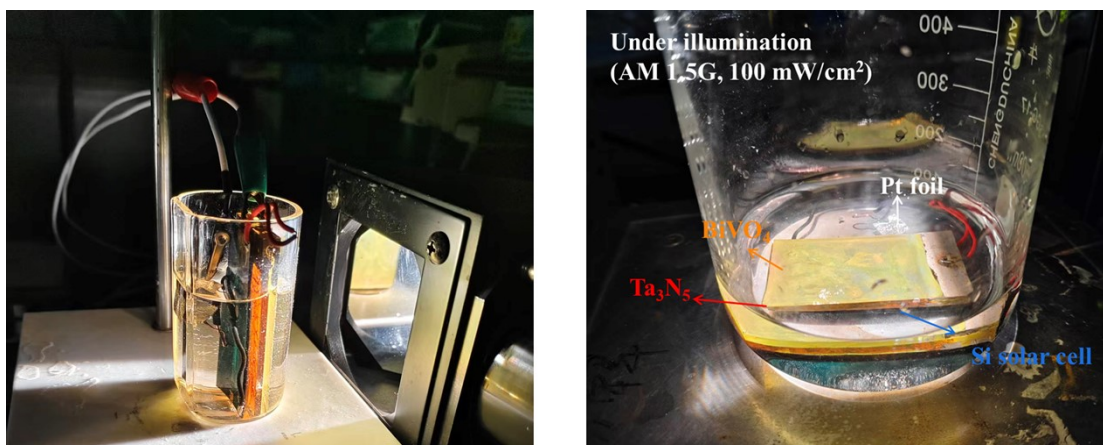

**Figure S21** Photos of BiVO<sub>4</sub>||Ta<sub>3</sub>N<sub>5</sub>-Si Unassisted PEC water splitting device.

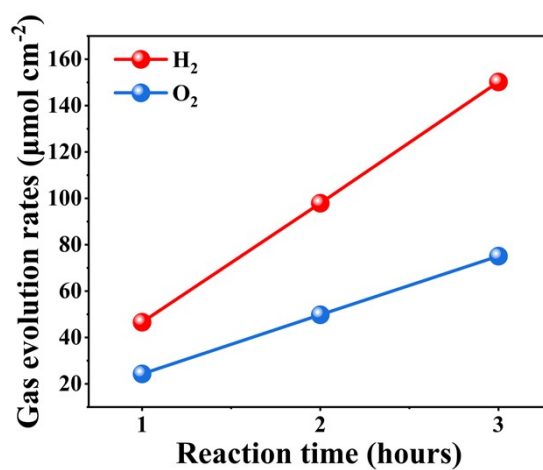

**Figure S22** Gas evolution rates from unassisted PEC water splitting at 1.23 V<sub>RHE</sub>.



**Table S2** Comparisons of photoelectrochemical performance (photocurrent density, IPCE, and stability) of BVO/an-TiO<sub>2</sub>/FeOOH/NiOOH with other reported BVO photoanodes.

| Year    | Photoanode                                                            | Measurement conditions                         | Performance at 1.23 V <sub>RHE</sub> | Maximum IPCE  | Stability | Ref.      |
|---------|-----------------------------------------------------------------------|------------------------------------------------|--------------------------------------|---------------|-----------|-----------|
| Present | BiVO <sub>4</sub> /an-TiO <sub>2</sub> /FeOOH/NiOOH                   | 1M K-Bi (pH 9.5)                               | 4.5 mA cm <sup>-2</sup>              | 80% at 460 nm | 5 h       | This work |
| 2023    | NiB/BiVO <sub>4</sub>                                                 | 0.5 M NaB+Ni <sup>2+</sup>                     | 6 mA cm <sup>-2</sup>                | 95% at 350 nm | 600 h     | 5         |
| 2022    | E-BiVO <sub>4</sub> /BPQDs/TiO <sub>2</sub>                           | 0.5 M KPi (pH 7)                               | 6.2 mA cm <sup>-2</sup>              | 58% at 380nm  | 50 h      | 6         |
| 2023    | BiVO <sub>4</sub> /PEI/TiO <sub>2</sub> /CoOOH                        | 0.5 M KPi (pH 8.0)                             | 2.03 mA cm <sup>-2</sup>             | 92% at 390 nm | 400 h     | 7         |
| 2022    | NiFeO <sub>x</sub> /P-BiVO <sub>4</sub>                               | 0.1 M KPi (pH 7)                               | 4.9 mA cm <sup>-2</sup>              | 75% at 410 nm | 10 h      | 8         |
| 2024    | NiMoFeCoCrOOH/BVO                                                     | 0.5 M KBi                                      | 5.23 mA cm <sup>-2</sup>             | 75% at 350 nm | 100 h     | 9         |
| 2022    | NiFeO <sub>x</sub> /Cr-BVO                                            | 1 M KBi (pH 9)                                 | 4.4 mA cm <sup>-2</sup>              | 58% at 390 nm | 24 h      | 10        |
| 2025    | Ov-BiVO <sub>4</sub> /MIL-101                                         | 1 M KBi (pH 9)                                 | 5.91 mA cm <sup>-2</sup>             | 89% at 390 nm | 3.5 h     | 11        |
| 2024    | BiVO <sub>4</sub> /Fe <sub>2</sub> TiO <sub>5</sub> /MF               | 1 M KBi buffer (pH 9.5)                        | 3.33 mA cm <sup>-2</sup>             | 60% at 460 nm | 6 h       | 12        |
| 2025    | BiVO <sub>4</sub> /NiCo <sub>2</sub> O <sub>4</sub> /TiO <sub>2</sub> | 0.5 M KBi (PH 8.5)                             | 3.62 mA cm <sup>-2</sup>             | 68% at 420 nm | 9 h       | 13        |
| 2025    | CoFe-OEC/TiN/BVO                                                      | 0.5 M NaBi                                     | 5 mA cm <sup>-2</sup>                | 80% at 450 nm | 5 h       | 14        |
| 2022    | NiFe-MOFs/BiVO <sub>4</sub>                                           | 0.5 M K <sub>3</sub> BO <sub>3</sub> (pH 9.5)  | 4.61 mA cm <sup>-2</sup>             | 58% at 410 nm | 3 h       | 15        |
| 2023    | NiOOH/Co <sub>3</sub> O <sub>4</sub> /BiVO <sub>4</sub>               | 1 M KBi                                        | 6.4 mA cm <sup>-2</sup>              | 91% at 440 nm | 90 h      | 16        |
| 2023    | Ni(OH) <sub>2</sub> /Cl-BiVO <sub>4</sub>                             | 0.5 M K <sub>3</sub> BO <sub>3</sub> (pH 9.5)  | 4.33 mA cm <sup>-2</sup>             | 55% at 390 nm | 3 h       | 17        |
| 2024    | NiFeO <sub>x</sub> /EBVO-(-150)                                       | 1 M KBi (pH 9.5)                               | 6.3 mA cm <sup>-2</sup>              | 80% at 400 nm | 30 h      | 18        |
| 2024    | Cu-RuO <sub>2</sub> -Tm-BiVO <sub>4</sub>                             | 0.5 M Na <sub>2</sub> SO <sub>4</sub> (pH 6.4) | 5.3 mA cm <sup>-2</sup>              | 85% at 420 nm | 24 h      | 19        |

**Table S3** Comparison of representative BiVO<sub>4</sub>-based unassisted tandem PEC water-splitting systems coupled with non-perovskite photovoltaic devices, with reported STH efficiencies.

| Year | System                                                                  | Electrolyte         | STH (%) | Ref.      |
|------|-------------------------------------------------------------------------|---------------------|---------|-----------|
| 2025 | BiVO <sub>4</sub>   Ta <sub>3</sub> N <sub>5</sub> -Si solar cell       | 1 M KBi             | 3.1     | This work |
| 2020 | Fe(Ni)OOH/BiVO <sub>4</sub> /WO <sub>3</sub> /TiO <sub>2</sub>          | 0.5 M Kbi           | 0.25    | 20        |
|      | /SiO <sub>x</sub> /n Si                                                 | (pH 9)              |         |           |
| 2023 | NiFe-LDH/BVO/SnO <sub>2</sub> /TTO                                      | 1 M KBi             | 1.7     | 21        |
|      | /TOPCon Si                                                              | (pH 9.5)            |         |           |
| 2023 | n-Si/BiVO <sub>4</sub> tandem                                           | 1 M KBi<br>(pH 9.5) | 0.6     | 22        |
| 2023 | n <sup>+</sup> p-                                                       | 1 M KBi             | 3.9     | 23        |
|      | Si/Nb <sub>2</sub> O <sub>5</sub> /NiPt  W:BiVO <sub>4</sub> /NiCoO(OH) | (pH 9.5)            |         |           |
| 2025 | Ov-BiVO <sub>4</sub> /MIL-101-Si solar cell                             | 1 M KPi<br>(pH 9.5) | 4.3     | 11        |
| 2020 | NiOOH/FeOOH/BiVO <sub>4</sub> /Pt/SiHJ-Si                               | 1 M KBi<br>(pH 9)   | 3.5     | 24        |



## References

1. W. Shockley and H. J. Queisser, *J. Appl. Phys.*, 1961, **32**, 510-519.
2. S. Y. Reece, J. A. Hamel, K. Sung, T. D. Jarvi, A. J. Esswein, J. J. H. Pijpers and D. G. Nocera, *Science*, 2011, **334**, 645-648.
3. B. Khan, M. B. Faheem, K. Peramaiah, J. Nie, H. Huang, Z. Li, C. Liu, K.-W. Huang and J.-H. He, *Nat. Commun.*, 2024, **15**, 6990.
4. Y. Qiu, W. Liu, W. Chen, W. Chen, G. Zhou, P. C. Hsu, R. Zhang, Z. Liang, S. Fan, Y. Zhang and Y. Cui, *Sci. Adv.*, 2016, **2**, e1501764.
5. R. T. Gao, N. T. Nguyen, T. Nakajima, J. L. He, X. H. Liu, X. Y. Zhang, L. Wang and L. M. Wu, *Sci. Adv.*, 2023, **9**, eade4589.
6. B. J. Jin, Y. Cho, C. Park, J. Jeong, S. Kim, J. Jin, W. Kim, L. Y. Wang, S. Y. Lu, S. L. Zhang, S. H. Oh, K. Zhang and J. H. Park, *Energy Environ. Sci.*, 2022, **15**, 672-679.
7. S. Bae, T. Moehl, E. Service, M. Kim, P. Adams, Z. B. Wang, Y. Choi, J. Ryu and S. D. Tilley, *Nat. Commun.*, 2024, **15**, 9439.
8. H. Wu, L. Zhang, A. J. Du, R. Irani, R. van de Krol, F. F. Abdi and Y. H. Ng, *Nat. Commun.*, 2022, **13**, 6231.
9. L. Wang, Z. H. Gao, K. R. Su, N. T. Nguyen, R. T. Gao, J. X. Chen and L. Wang, *Adv. Funct. Mater.*, 2024, **34**, 2315674.
10. Y. J. Jeong, D. H. Seo, J. H. Baek, M. J. Kang, B. N. Kim, S. K. Kim, X. L. Zheng and I. S. Cho, *Adv. Funct. Mater.*, 2022, **32**, 2208196.
11. Y. L. Xin, J. Tian, X. Q. Xiong, C. L. Wu, S. A. C. Carabineiro, X. G. Yang, Z. X. Chen, Y. Xia and Y. X. Jin, *Adv. Mater.*, 2025, **37**, 2417589.
12. Q. J. Wang, L. L. Oldham, A. Giner-Requena, Z. Y. Wang, D. Benetti, S. Montilla-Verdú, R. Chen, D. F. Du, T. Lana-Villarreal, U. Aschauer, N. Guijarro, J. R. Durrant and J. S. Luo, *J. Am. Chem. Soc.*, 2024, **146**, 34681-34689.
13. J. W. Yang, M. N. Chao, Q. Zhao, J. P. Li and G. Liu, *J. Alloys Compd.*, 2025, **1024**, 180186.
14. H. H. Sun, P. Wang, W. Hua, D. Lei, Y. Y. Li and J. G. Wang, *J. Colloid Interface Sci.*, 2025, **689**, 137212.
15. Y. Li, Q. Wang, X. Hu, Y. Meng, H. She, L. Wang, J. Huang and G. Zhu, *Chem. Eng. J.*, 2022, **433**,

133592.

16. Y. Zhang, L. Xu, B. Liu, X. Wang, T. Wang, X. Xiao, S. Wang and W. Huang, *ACS Catal.*, 2023, **13**, 5938-5948.
17. J. Zhang, X. Wei, J. Zhao, Y. Zhang, L. Wang, J. Huang, H. She and Q. Wang, *Chem. Eng. J.*, 2023, **454**, 140081.
18. X. Li, Z. Wang, A. Sasani, A. Baktash, K. Wang, H. Lu, J. You, P. Chen, P. Chen, Y. Bao, S. Zhang, G. Liu and L. Wang, *Nat. Commun.*, 2024, **15**, 9127.
19. K. Tian, L. Jin, A. Mahmood, H. Yang, P. An, J. Zhang, Y. Ji, Y. Li, D. Li, S. Liu and J. Yan, *Adv. Funct. Mater.*, 2024, **34**, 2410548.
20. I. Y. Ahmet, S. Berglund, A. Chemseddine, P. Bogdanoff, R. F. Präg, F. F. Abdi and R. van de Krol, *Adv. Energy Sustain. Res.*, 2020, **1**, 2000037.
21. G. Jung, C. Moon, F. Martinho, Y. Jung, J. Chu, H. Park, A. Hajjafarassar, R. Nielsen, J. Schou, J. Park, P. C. K. Vesborg, O. Hansen, Y. S. Lee, S. Canulescu and B. Shin, *Adv. Energy Mater.*, 2023, **13**, 2301235.
22. S. Wang, S. Feng, B. Liu, Z. Gong, T. Wang and J. Gong, *Chem. Sci.*, 2023, **14**, 2192-2199.
23. M. Arunachalam, R. Subhash Kanase, J. Ganapati Badiger, S. Abdelfattah Sayed, K. S. Ahn, J. S. Ha, S. W. Ryu and S. Hyung Kang, *Chem. Eng. J.*, 2023, **474**, 145262.
24. S. Feng, T. Wang, B. Liu, C. Hu, L. Li, Z. J. Zhao and J. Gong, *Angew. Chem., Int. Ed.*, 2020, **59**, 2044-2048.
